# Supplementary material for: Allometry and Scaling of the Intraocular Pressure and Aqueous Humour Flow Rate in Vertebrate Eyes
Source: PubMed Central journal article supplement (PMC4798774; doi:10.1371/journal.pone.0151490), 2016-03-18
Supplement: pone.0151490.s001.pdf [file pone.0151490.s001.pdf]

Mean IOP, standard deviation and typical body mass of amphibians extracted through the systematic review.

| Species                        | Common name                  | Sources | Sample size (eyes) | Mean IOP (mmHg) | Standard Deviation (mmHg) | Typical Body Mass (kg) |
|--------------------------------|------------------------------|---------|--------------------|-----------------|---------------------------|------------------------|
| <i>Anaxyrus americanus</i>     | <b>American Toad</b>         | [50]    | 70                 | 7.3             | 1.2                       | $21.5 \times 10^{-3}$  |
| <i>Anaxyrus cognatus</i>       | <b>Great Plains Toad</b>     | [50]    | 68                 | 6.3             | 1.1                       | $65 \times 10^{-3}$    |
| <i>Anaxyrus woodhouseii</i>    | <b>Woodhouse's Toad</b>      | [50]    | 36                 | 5.8             | 1.5                       | $70.5 \times 10^{-3}$  |
| <i>Lithobates blairi</i>       | <b>Plains Leopard Frog</b>   | [50]    | 66                 | 6.3             | 1.4                       | $32.5 \times 10^{-3}$  |
| <i>Lithobates catesbeianus</i> | <b>American Bullfrog</b>     | [50]    | 12                 | 5.1             | 1.4                       | $107.5 \times 10^{-3}$ |
| <i>Rhinella marina</i>         | <b>Cane Toad</b>             | [50]    | 8                  | 6.3             | 1.4                       | $317.5 \times 10^{-3}$ |
| <i>Spea bombifrons</i>         | <b>Plains Spadefoot Toad</b> | [50]    | 60                 | 6.5             | 1.5                       | $21 \times 10^{-3}$    |
