# Supplementary material for: Allometry and Scaling of the Intraocular Pressure and Aqueous Humour Flow Rate in Vertebrate Eyes
Source: PubMed Central journal article supplement (PMC4798774; doi:10.1371/journal.pone.0151490), 2016-03-18
Supplement: pone.0151490.s002.pdf [file pone.0151490.s002.pdf]

Mean IOP, standard deviation and typical body mass of birds extracted through the systematic review.

| Species                       | Common name                        | Sources      | Sample size (eyes) | Mean IOP (mmHg) | Standard Deviation (mmHg) | Typical Body Mass (kg) |
|-------------------------------|------------------------------------|--------------|--------------------|-----------------|---------------------------|------------------------|
| <i>Accipiter cooperii</i>     | <b>Cooper's Hawk</b>               | [51]         | 6                  | 13.35           | 0.67                      | 0.46                   |
| <i>Accipiter gentilis</i>     | <b>Northern Hawk</b>               | [40]         | 18                 | 21.2            | 2.4                       | 1                      |
| <i>Accipiter nisus</i>        | <b>Eurasian Sparrowhawk</b>        | [40]         | 26                 | 16.0            | 2.48                      | 0.23                   |
| <i>Aquila chrysaetos</i>      | <b>Golden Eagle</b>                | [52]         | 14                 | 21.5            | 3.0                       | 5                      |
| <i>Asio otus</i>              | <b>Long-Eared Owl</b>              | [40,53]      | 21                 | 8.75            | 3.04                      | 0.31                   |
| <i>Athene noctua</i>          | <b>Little Owl</b>                  | [53,54]      | 44                 | 10.05           | 1.56                      | 0.18                   |
| <i>Bubo Bubo</i>              | <b>Eurasian Eagle Owl</b>          | [55]         | 20                 | 9.9             | 0.30                      | 3                      |
| <i>Bubo Bubo ascalaphus</i>   | <b>Pharaoh Eagle Owl</b>           | [53]         | 2                  | 7.8             | 3.5                       | 3                      |
| <i>Bubo Bubo interpositus</i> | <b>Aharoni's Eagle Owl</b>         | [53]         | 4                  | 15.4            | 4.1                       | 3                      |
| <i>Bubo virginianus</i>       | <b>Great-Horned Owl</b>            | [51,52]      | 25                 | 10.13           | 3.38                      | 2                      |
| <i>Buteo Buteo</i>            | <b>Common Buzzard</b>              | [40, 53, 54] | 116                | 23.71           | 12.0                      | 0.9                    |
| <i>Buteo buteo vulpinus</i>   | <b>Steppe Buzzard</b>              | [53]         | 2                  | 25.0            | 1.6                       | 0.9                    |
| <i>Buteo jamaicensis</i>      | <b>Red-Tailed Hawk</b>             | [51,52]      | 64                 | 20.15           | 7.52                      | 1                      |
| <i>Buteo rufinus</i>          | <b>Long-Legged Buzzard</b>         | [53]         | 4                  | 13.3            | 4.0                       | 1.2                    |
| <i>Buteo swainsoni</i>        | <b>Swainson's Hawk</b>             | [52]         | 12                 | 20.8            | 2.3                       | 0.98                   |
| <i>Carthartes aura</i>        | <b>Turkey Vulture</b>              | [51]         | 6                  | 13.35           | 1.78                      | 1.55                   |
| <i>Circaetus aeruginosus</i>  | <b>Short-Toed Snake Eagle</b>      | [53]         | 4                  | 13.6            | 0.8                       | 1.75                   |
| <i>Circus gallicus</i>        | <b>Western March Harrier</b>       | [53]         | 4                  | 18.6            | 2.2                       | 0.53                   |
| <i>Circus pygargus</i>        | <b>Montagu's Harrier</b>           | [53]         | 4                  | 13.4            | 1.1                       | 0.31                   |
| <i>Eudypptes chrysocome</i>   | <b>Southern Rockhopper Penguin</b> | [56]         | 32                 | 22.05           | 3.72                      | 2.7                    |
| <i>Eudypptes chrysolophus</i> | <b>Macaroni Penguin</b>            | [56]         | 50                 | 27.85           | 4.34                      | 5.5                    |

| Species                        | Common name                   | Sources      | Sample size (eyes) | Mean IOP (mmHg) | Standard Deviation (mmHg) | Typical Body Mass (kg) |
|--------------------------------|-------------------------------|--------------|--------------------|-----------------|---------------------------|------------------------|
| <i>Falco pelegrinoides</i>     | <b>Barbary Falcon</b>         | [53]         | 2                  | 9.2             | 1.8                       | 0.54                   |
| <i>Falco naumanni</i>          | <b>Lesser Kestrel</b>         | [53]         | 2                  | 13.7            | 1.0                       | 0.15                   |
| <i>Falco peregrinus</i>        | <b>Peregrine Falcon</b>       | [40]         | 4                  | 15.3            | 6.1                       | 0.89                   |
| <i>Falco sparverius</i>        | <b>American Kestrel</b>       | [51]         | 8                  | 7.65            | 8.5                       | 0.17                   |
| <i>Falco tinnunculus</i>       | <b>Common Kestrel</b>         | [40, 53, 54] | 95                 | 10.42           | 3.77                      | 0.17                   |
| <i>Haliaeetus albicilla</i>    | <b>White-Tailed Sea Eagle</b> | [40]         | 25                 | 27.8            | 5.7                       | 5                      |
| <i>Haliaeetus albicilla</i>    | <b>Bald Eagle</b>             | [52, 57]     | 37                 | 21.38           | 0.38                      | 4.65                   |
| <i>Megascops asio</i>          | <b>Eastern Screech Owl</b>    | [51, 58]     | 46                 | 11.12           | 1.25                      | 0.16                   |
| <i>Milvus migrans</i>          | <b>Black Kite</b>             | [53]         | 10                 | 17.1            | 7.2                       | 0.79                   |
| <i>Milvus milvus</i>           | <b>Red Kite</b>               | [40]         | 6                  | 12.7            | 6.5                       | 1.05                   |
| <i>Otus scops</i>              | <b>Scops Owl</b>              | [53]         | 23                 | 14.5            | 3.9                       | 0.05                   |
| <i>Pernis apivorus</i>         | <b>European Honey Buzzard</b> | [53]         | 18                 | 14.4            | 2.8                       | 0.75                   |
| <i>Phoenicopterus ruber</i>    | <b>American Flamingo</b>      | [59, 60]     | 74                 | 12.64           | 4.52                      | 3.1                    |
| <i>Poicephalus rufiventris</i> | <b>Red-Bellied Parrot</b>     | [61]         | 2                  | 11.5            | 0.71                      | 0.14                   |
| <i>Rhea americana</i>          | <b>Great Rhea</b>             | [62]         | 2                  | 11.5            | 0.71                      | 24                     |
| <i>Spheniscus demersus</i>     | <b>Black-Footed Penguin</b>   | [63, 64]     | 70                 | 28.76           | 12.70                     | 2.82                   |
| <i>Spheniscus humboldti</i>    | <b>Humboldt Penguin</b>       | [65]         | 48                 | 20.36           | 4.1                       | 4.75                   |
| <i>Strix aluco</i>             | <b>Eurasian Tawny Owl</b>     | [40, 54]     | 52                 | 11.18           | 0.05                      | 0.6                    |
| <i>Strix varia</i>             | <b>Barred Owl</b>             | [51]         | 3                  | 10.0            | 2.3                       | 0.78                   |
| <i>Struthio camelus</i>        | <b>Ostrich</b>                | [66]         | 40                 | 18.3            | 3.5                       | 103                    |
| <i>Tyto alba</i>               | <b>Barn Owl</b>               | [40, 53]     | 33                 | 17.21           | 7.12                      | 0.41                   |
