# Supplementary material for: Allometry and Scaling of the Intraocular Pressure and Aqueous Humour Flow Rate in Vertebrate Eyes
Source: PubMed Central journal article supplement (PMC4798774; doi:10.1371/journal.pone.0151490), 2016-03-18
Supplement: pone.0151490.s003.pdf [file pone.0151490.s003.pdf]

Mean IOP, standard deviation and typical body mass of fish extracted through the systematic review.

| Species                     | Common name          | Sources | Sample size (eyes) | Mean IOP (mmHg) | Standard Deviation (mmHg) | Typical Body Mass (kg) |
|-----------------------------|----------------------|---------|--------------------|-----------------|---------------------------|------------------------|
| <i>Cyprinus carpio</i>      | <b>Koi Fish</b>      | [67]    | 18                 | 4.94            | 2.99                      | 0.75                   |
| <i>Salvelinus gairdneri</i> | <b>Rainbow Trout</b> | [68]    | 54                 | 4.9             | 0.33                      | 1.4                    |
| <i>Salvelinus namaycush</i> | <b>Lake Trout</b>    | [68]    | 61                 | 13.2            | 0.67                      | 0.150                  |
