# Supplementary material for: Allometry and Scaling of the Intraocular Pressure and Aqueous Humour Flow Rate in Vertebrate Eyes
Source: PubMed Central journal article supplement (PMC4798774; doi:10.1371/journal.pone.0151490), 2016-03-18
Supplement: pone.0151490.s004.pdf [file pone.0151490.s004.pdf]

Mean IOP, standard deviation and typical body mass of mammals extracted through the systematic review.

| Species                                | Common name                    | Sources  | Sample size (eyes) | Mean IOP (mmHg) | Standard Deviation (mmHg) | Typical Body Mass (kg) |
|----------------------------------------|--------------------------------|----------|--------------------|-----------------|---------------------------|------------------------|
| <i>Adax nasomaculatus</i>              | <b>Addax Antelope</b>          | [69]     | 36                 | 11.2            | 3.2                       | 85.6                   |
| <i>Aepyceros melampus</i>              | <b>Impala</b>                  | [69]     | 8                  | 8.0             | 1.2                       | 53.5                   |
| <i>Arctocephalus pusillus pusillus</i> | <b>South African Fur Seal</b>  | [70]     | 2                  | 31.5            | 0.7                       | 210                    |
| <i>Bos taurus taurus</i>               | <b>Cattle</b>                  | [71, 72] | 138                | 25.97           | 14.30                     | 900                    |
| <i>Canis lupus familiaris</i>          | <b>Dog (Beagle)</b>            | [73]     | 4                  | 12.8            | 2.1                       | 10                     |
| <i>Capra hicus</i>                     | <b>Pigmy Goat</b>              | [74]     | 20                 | 10.17           | 0.30                      | 35                     |
| <i>Capra ibex nubiana</i>              | <b>Nubian Ibex</b>             | [75]     | 24                 | 17.95           | 4.78                      | 39.2                   |
| <i>Castor canadensis</i>               | <b>Canadian Beaver</b>         | [76]     | 32                 | 17.95           | 4.64                      | 14.5                   |
| <i>Cebus abella</i>                    | <b>Capuchin Monkey</b>         | [77]     | 30                 | 18.4            | 3.8                       | 3.5                    |
| <i>Ceratotherium simum</i>             | <b>Wide-Lipped Rhinoceros</b>  | [69]     | 22                 | 32.1            | 10.4                      | 2055                   |
| <i>Chinchilla lanigera</i>             | <b>Chinchilla</b>              | [78, 79] | 142                | 17.87           | 6.26                      | 0.5                    |
| <i>Connochaetes gnou</i>               | <b>Wide-tailed Wildebeest</b>  | [69]     | 20                 | 15.5            | 3.7                       | 121                    |
| <i>Dama mesopotamica</i>               | <b>Asian Fallow Deer</b>       | [80]     | 15                 | 11.9            | 3.3                       | 65                     |
| <i>Equus burchelli</i>                 | <b>Grant Zebra</b>             | [75]     | 26                 | 26.26           | 1.03                      | 138                    |
| <i>Equus ferus caballus</i>            | <b>Horse</b>                   | [72]     | 20                 | 24.25           | 0.93                      | 500                    |
| <i>Felis catus</i>                     | <b>Cat</b>                     | [81–84]  | 97                 | 19.68           | 4.33                      | 3.0                    |
| <i>Gazella thomsoni</i>                | <b>Thomson's Gazelle</b>       | [85]     | 22                 | 7.6             | 1.6                       | 22                     |
| <i>Gorilla gorilla gorilla</i>         | <b>Western Lowland Gorilla</b> | [86]     | 10                 | 12.0            | 4.3                       | 125                    |
| <i>Grampus griseus</i>                 | <b>Risso's Dolphin</b>         | [87]     | 2                  | 28.1            | 0.85                      | 400                    |
| <i>Hemiechinus auritus</i>             | <b>Long-Eared Hedgehog</b>     | [88]     | 28                 | 20.1            | 4.0                       | 0.38                   |

| Species                                | Common name                             | Sources    | Sample size (eyes) | Mean IOP (mmHg) | Standard Deviation (mmHg) | Typical Body Mass (kg) |
|----------------------------------------|-----------------------------------------|------------|--------------------|-----------------|---------------------------|------------------------|
| <i>Homo sapiens sapiens</i>            | <b>Human</b>                            | [89, 90]   | 154                | 15.48           | 1.92                      | 65                     |
| <i>Hydrochaeris hydrochaeris</i>       | <b>Capybara</b>                         | [91]       | 44                 | 16.47           | 4.28                      | 50                     |
| <i>Lama glama</i>                      | <b>Llama</b>                            | [92]       | 32                 | 13.10           | 0.35                      | 165                    |
| <i>Macaca fascicularis</i>             | <b>Cynomolgus Monkey</b>                | [93, 94]   | 20                 | 19.48           | 5.83                      | 5                      |
| <i>Macaca Mulatta</i>                  | <b>Rhesus Macaque</b>                   | [95–97]    | 370                | 16.83           | 3.63                      | 6.5                    |
| <i>Macropus fuliginosus</i>            | <b>Western Gray Kangaroo</b>            | [98]       | 16                 | 14.04           | 3.47                      | 41                     |
| <i>Macropus rufus</i>                  | <b>Red Kangaroo</b>                     | [41]       | 20                 | 17.45           | 7.23                      | 51                     |
| <i>Mazama gouazoubira</i>              | <b>Brown Brocket Deer</b>               | [99]       | 18                 | 15.3            | 3.1                       | 18                     |
| <i>Mus musculus</i>                    | <b>Mouse (Swiss White)</b>              | [100–102]  | 34                 | 15.84           | 1.65                      | 0.03                   |
| <i>Mustela putorius furo</i>           | <b>Ferret</b>                           | [103]      | 30                 | 14.5            | 3.27                      | 1.45                   |
| <i>Orycteropus afer</i>                | <b>Aardvark</b>                         | [104]      | 2                  | 15.5            | 2.12                      | 52.5                   |
| <i>Oryctolagus cuniculus cuniculus</i> | <b>Rabbit (New Zealand White)</b>       | [105–109]  | 125                | 19.71           | 3.17                      | 3                      |
| <i>Oryx dammah</i>                     | <b>Scimitar-horned Oryx</b>             | [69]       | 14                 | 15.8            | 1.5                       | 111.4                  |
| <i>Oryx leucoryx</i>                   | <b>Arabian Oryx</b>                     | [75]       | 15                 | 15.4            | 26.67                     | 132                    |
| <i>Ovis aries</i>                      | <b>Sheep</b>                            | [110]      | 10                 | 14.57           | 0.43                      | 35                     |
| <i>Panthera leo</i>                    | <b>Lion</b>                             | [111]      | 44                 | 22.9            | 0.89                      | 125                    |
| <i>Phascolarctos cinereus</i>          | <b>Koala</b>                            | [112]      | 40                 | 24.2            | 6.45                      | 9.5                    |
| <i>Pongo pygmaeus</i>                  | <b>Orangutan</b>                        | [113]      | 2                  | 13.5            | 0.71                      | 50                     |
| <i>Pteropus hypomelanus</i>            | <b>Island Flying Fox</b>                | [114]      | 20                 | 14.78           | 0.01                      | 0.194                  |
| <i>Pteropus pumilus</i>                | <b>Little Golden-Mantled Flying Fox</b> | [114]      | 20                 | 19.07           | 0.30                      | 0.5                    |
| <i>Pteropus vampyrus</i>               | <b>Malayan Flying Fox</b>               | [114]      | 20                 | 16.2            | 0.55                      | 0.9                    |
| <i>Rattus norvegicus</i>               | <b>Rat (Lewis)</b>                      | [115, 116] | 255                | 17.29           | 7.37                      | 0.3                    |

| <b>Species</b>                | <b>Common name</b>           | <b>Sources</b> | <b>Sample size (eyes)</b> | <b>Mean IOP (mmHg)</b> | <b>Standard Deviation (mmHg)</b> | <b>Typical Body Mass (kg)</b> |
|-------------------------------|------------------------------|----------------|---------------------------|------------------------|----------------------------------|-------------------------------|
| <i>Rhinoceros unicornis</i>   | <b>One-Horned Rhinoceros</b> | [117]          | 10                        | 31.2                   | 6.62                             | 2055                          |
| <i>Rusa unicolor</i>          | <b>Sambar Deer</b>           | [42]           | 40                        | 11.4                   | 2.8                              | 102                           |
| <i>Sus scrofa domesticus</i>  | <b>Domestic Pig</b>          | [118]          | 14                        | 14.1                   | 2.2                              | 20                            |
| <i>Tursiops truncatus</i>     | <b>Bottle-Nosed Dolphin</b>  | [87]           | 4                         | 29                     | 0.27                             | 400                           |
| <i>Vicugna pacos</i>          | <b>Alpaca</b>                | [92]           | 36                        | 14.85                  | 0.45                             | 75                            |
| <i>Zalophus californianus</i> | <b>California Sea Lion</b>   | [119]          | 39                        | 32.8                   | 3.2                              | 250                           |
