# Supplementary material for: Allometry and Scaling of the Intraocular Pressure and Aqueous Humour Flow Rate in Vertebrate Eyes
Source: PubMed Central journal article supplement (PMC4798774; doi:10.1371/journal.pone.0151490), 2016-03-18
Supplement: pone.0151490.s005.pdf [file pone.0151490.s005.pdf]

Mean IOP, standard deviation and typical body mass of reptiles extracted through the systematic review.

| Species                                   | Common name                    | Sources | Sample size (eyes) | Mean IOP (mmHg) | Standard Deviation (mmHg) | Typical Body Mass (kg) |
|-------------------------------------------|--------------------------------|---------|--------------------|-----------------|---------------------------|------------------------|
| <i>Alligator mississippiensis</i>         | <b>American Alligator</b>      | [43]    | 16                 | 11.6            | 0.5                       | 300                    |
| <i>Caiman latirostris</i>                 | <b>Broad-Snouted Caiman</b>    | [120]   | 28                 | 12.9            | 6.1                       | 45                     |
| <i>Chelonoidis carbonaria</i>             | <b>Red-footed Tortoise</b>     | [121]   | 50                 | 15.3            | 8.81                      |                        |
| <i>Chelonoidis denticulata</i>            | <b>Yellow-footed Tortoise</b>  | [122]   | 30                 | 14.2            | 1.2                       | 15                     |
| <i>Cyclura cychlura</i><br><i>Cyclura</i> | <b>Andros Island Iguana</b>    | [123]   | 104                | 4.89            | 1.73                      | 2.5                    |
| <i>Emys orbicularis</i>                   | <b>European Pond Turtle</b>    | [124]   | 44                 | 5.42            | 0.96                      | 0.33                   |
| <i>Terrapene carolina major</i>           | <b>Gulf Coast Box Turtle</b>   | [125]   | 138                | 6.7             | 1.4                       | 0.72                   |
| <i>Terrapene carolina triunguis</i>       | <b>Three-toed Box Turtle</b>   | [125]   | 48                 | 8.3             | 1.5                       | 0.41                   |
| <i>Testudo Hermanni</i>                   | <b>Hermann's Tortoise</b>      | [126]   | 52                 | 15.74           | 0.2                       | 3.5                    |
| <i>Trachemys scripta elegans</i>          | <b>Red-Eared Slider Turtle</b> | [127]   | 34                 | 10.76           | 1.02                      | 0.77                   |
