# Supplementary material for: Allometry and Scaling of the Intraocular Pressure and Aqueous Humour Flow Rate in Vertebrate Eyes
Source: PubMed Central journal article supplement (PMC4798774; doi:10.1371/journal.pone.0151490), 2016-03-18
Supplement: pone.0151490.s006.pdf [file pone.0151490.s006.pdf]

**Table A. Amphibians**

| Species                        | Common Name                  | Sample Size (eyes) | Mean (mmHg) | Standard Deviation (mmHg) | Method <sup>1</sup> | Weight (if indicated) (kg) | Source |
|--------------------------------|------------------------------|--------------------|-------------|---------------------------|---------------------|----------------------------|--------|
| <i>Anaxyrus americanus</i>     | <b>American Toad</b>         | 70                 | 7.3         | 1.2                       | TonoVet (P)         | 0.004-0.039                | [50]   |
| <i>Anaxyrus cognatus</i>       | <b>Great Plains Toad</b>     | 68                 | 6.3         | 1.1                       | TonoVet (P)         | 0.037-0.093                | [50]   |
| <i>Anaxyrus woodhouseii</i>    | <b>Woodhouse's Toad</b>      | 36                 | 5.8         | 1.5                       | TonoVet (P)         | 0.042-0.099                | [50]   |
| <i>Lithobates blairi</i>       | <b>Plains Leopard Frog</b>   | 66                 | 6.3         | 1.4                       | TonoVet (P)         | 0.006-0.059                | [50]   |
| <i>Lithobates catesbeianus</i> | <b>American Bullfrog</b>     | 12                 | 5.1         | 1.4                       | TonoVet (P)         | 0.016-0.199                | [50]   |
| <i>Rhinella marina</i>         | <b>Cane Toad</b>             | 8                  | 6.3         | 1.4                       | TonoVet (P)         | 0.235-0.400                | [50]   |
| <i>Speo bombifrons</i>         | <b>Plains Spadefoot Toad</b> | 60                 | 6.5         | 1.5                       | TonoVet (P)         | 0.005-0.037                | [50]   |

---

<sup>1</sup> See Table F for types of tonometry and manufacturers.

**Table B. Birds**

| Species                       | Common Name                 | Sample Size (eyes) | Mean (mmHg) | Standard Deviation (mmHg) | Method      | Weight (if indicated) (kg) | Source |
|-------------------------------|-----------------------------|--------------------|-------------|---------------------------|-------------|----------------------------|--------|
| <i>Accipiter cooperii</i>     | <b>Cooper's Hawk</b>        | 6                  | 16.0        | 1.8                       | Tono-Pen XL | <i>n.i.</i>                | [51]   |
|                               |                             |                    | 10.7        | 1.4                       | TonoVet (P) |                            |        |
| <i>Accipiter gentilis</i>     | <b>Northern Goshawk</b>     | 18                 | 21.2        | 2.4                       | TonoVet (D) | <i>n.i.</i>                | [40]   |
| <i>Accipiter nisus</i>        | <b>Eurasian Sparrowhawk</b> | 26                 | 16.0        | 2.8                       | TonoVet (D) | <i>n.i.</i>                | [40]   |
| <i>Aquila chrysaetos</i>      | <b>Golden Eagle</b>         | 14                 | 21.5        | 3.0                       | Tono-Pen XL | <i>n.i.</i>                | [52]   |
| <i>Asio otus</i>              | <b>Long-Eared Owl</b>       | 17                 | 8.5         | 3.0                       | TonoVet (D) | <i>n.i.</i>                | [40]   |
|                               |                             | 4                  | 9.8         | 1.2                       | Tono-Pen XL | <i>n.i.</i>                | [53]   |
| <i>Athene noctua</i>          | <b>Little Owl</b>           | 4                  | 12.3        | 2.5                       | Tono-Pen XL | <i>n.i.</i>                | [53]   |
|                               |                             | 40                 | 9.83        | 3.41                      | Tono-Pen XL |                            | [54]   |
| <i>Bubo bubo</i>              | <b>Eurasian Eagle Owl</b>   | 20                 | 9.35        | 1.81                      | Tono-Pen XL | <i>n.i.</i>                | [55]   |
|                               |                             | 20                 | 10.45       | 1.64                      | TonoVet     |                            |        |
| <i>Bubo bubo ascalaphus</i>   | <b>Pharaoh Eagle Owl</b>    | 2                  | 7.8         | 3.5                       | Tono-Pen XL | <i>n.i.</i>                | [53]   |
| <i>Bubo bubo interpositus</i> | <b>Aharoni's Eagle Owl</b>  | 4                  | 15.4        | 4.1                       | Tono-Pen XL | <i>n.i.</i>                | [53]   |
| <i>Bubo virginianus</i>       | <b>Great-Horned Owl</b>     | 15                 | 9.9         | 2.4                       | Tono-Pen XL | <i>n.i.</i>                | [51]   |
|                               |                             |                    | 9.9         | 2.2                       | TonoVet (P) |                            |        |
|                               |                             | 10                 | 10.8        | 3.6                       | Tono-Pen XL | <i>n.i.</i>                | [52]   |

|                               |                                    |    |                |               |             |             |      |
|-------------------------------|------------------------------------|----|----------------|---------------|-------------|-------------|------|
| <i>Buteo buteo</i>            | <b>Common Buzzard</b>              | 56 | 29.9           | 6.1           | TonoVet (D) | <i>n.i.</i> | [40] |
|                               |                                    | 20 | 19.4           | 3.9           | Tono-Pen XL |             | [53] |
|                               |                                    | 40 | 17.2           | 3.53          | Tono-Pen XL |             | [54] |
| <i>Buteo buteo vulpinus</i>   | <b>Steppe Buzzard</b>              | 2  | 25.0           | 1.6           | Tono-Pen XL | <i>n.i.</i> | [53] |
| <i>Buteo jamaicensis</i>      | <b>Red-Tailed Hawk</b>             | 44 | 20.3           | 2.8           | Tono-Pen XL | <i>n.i.</i> | [51] |
|                               |                                    |    | 19.8           | 4.9           | TonoVet (P) |             |      |
|                               |                                    | 20 | 20.6           | 3.4           | Tono-Pen XL | <i>n.i.</i> | [52] |
| <i>Buteo rufinus</i>          | <b>Long-Legged Buzzard</b>         | 4  | 13.3           | 4             | Tono-Pen XL | <i>n.i.</i> | [53] |
| <i>Buteo swainsoni</i>        | <b>Swainson's Hawk</b>             | 12 | 20.8           | 2.3           | Tono-Pen XL | <i>n.i.</i> | [52] |
| <i>Carthartes aura</i>        | <b>Turkey vulture</b>              | 6  | 15.0           | 2.1           | Tono-Pen XL | <i>n.i.</i> | [51] |
|                               |                                    |    | 11.7           | 1.0           | TonoVet (P) |             |      |
| <i>Circaetus aeruginosus</i>  | <b>Short-Toed Snake Eagle</b>      | 4  | 13.6           | 0.8           | Tono-Pen XL | <i>n.i.</i> | [53] |
| <i>Circus gallicus</i>        | <b>Western March Harrier</b>       | 4  | 18.6           | 2.2           | Tono-Pen XL | <i>n.i.</i> | [53] |
| <i>Circus pygargus</i>        | <b>Montagu's Harrier</b>           | 4  | 13.4           | 1.1           | Tono-Pen XL | <i>n.i.</i> | [53] |
| <i>Eudypetes chrysocome</i>   | <b>Southern Rockhopper Penguin</b> | 32 | 24.1           | 5.09          | TonoVet (D) | <i>n.i.</i> | [56] |
|                               |                                    |    | 20.0           | 5.77          | Tono-Pen XL |             |      |
| <i>Eudypetes chrysolophus</i> | <b>Macaroni Penguin</b>            | 50 | 31.6 (healthy) | 6.9 (healthy) | TonoVet (D) | <i>n.i.</i> | [56] |
|                               |                                    |    | 24.1(healthy)  | 7.5 (healthy) | Tono-Pen XL |             |      |
| <i>Falco pelegrinoides</i>    | <b>Barbary Falcon</b>              | 2  | 9.2            | 1.8           | Tono-Pen XL | <i>n.i.</i> | [53] |
| <i>Falco naumanni</i>         | <b>Lesser Kestrel</b>              | 2  | 13.7           | 1.0           | Tono-Pen XL | <i>n.i.</i> | [53] |
| <i>Falco peregrinus</i>       | <b>Peregrine Falcon</b>            | 4  | 15.3           | 6.1           | TonoVet (D) | <i>n.i.</i> | [40] |
| <i>Falco sparverius</i>       | <b>American Kestrel</b>            | 8  | 8.5            | 4.4           | Tono-Pen XL | <i>n.i.</i> | [51] |
|                               |                                    |    | 6.8            | 1.7           | TonoVet (P) |             |      |

|                                 |                               |    |                                  |                                |              |                                          |      |
|---------------------------------|-------------------------------|----|----------------------------------|--------------------------------|--------------|------------------------------------------|------|
| <i>Falco tinnunculus</i>        | <b>Common Kestrel</b>         | 19 | 11.6                             | 2.7                            | TonoVet (D)  | <i>n.i.</i>                              | [40] |
|                                 |                               | 36 | 11.9                             | 3.3                            | Tono-Vet XL  | <i>n.i.</i>                              | [53] |
|                                 |                               | 40 | 8.53                             | 1.59                           | Tono-Pen XL  | <i>n.i.</i>                              | [54] |
| <i>Haliaeetus albicilla</i>     | <b>White-Tailed Sea Eagle</b> | 25 | 27.8                             | 5.7                            | TonoVet (D)  | <i>n.i.</i>                              | [40] |
| <i>Haliaeetus leucocephalus</i> | <b>Bald Eagle</b>             | 5  | 20.6                             | 2.0                            | Tono-Pen XL  | <i>n.i.</i>                              | [57] |
|                                 |                               | 32 | 21.5                             | 1.7                            | Tono-Pen     | <i>n.i.</i>                              | [52] |
| <i>Megascops asio</i>           | <b>Eastern Screech Owl</b>    | 4  | 9.3                              | 2.6                            | Tono-Pen XL  | <i>n.i.</i>                              | [58] |
|                                 |                               |    | 6.3                              | 1.3                            | TonoVet (P)  |                                          |      |
|                                 |                               | 42 | 9                                | 1.8                            | Tono-Vet (P) | 0.1623 (0.018.1 SD)<br>(0.1314 – 0.1935) | [51] |
|                                 |                               |    | 14                               | 2.4                            | Tono-Vet (D) |                                          |      |
|                                 |                               |    | 11                               | 1.9                            | TonoPen XL   |                                          |      |
| <i>Milvus migrans</i>           | <b>Black Kite</b>             | 10 | 17.1                             | 7.2                            | Tono-Vet XL  | <i>n.i.</i>                              | [53] |
| <i>Milvus milvus</i>            | <b>Red Kite</b>               | 6  | 12.7                             | 6.5                            | TonoVet (D)  | <i>n.i.</i>                              | [40] |
| <i>Otus scops</i>               | <b>Scops Owl</b>              | 23 | 14.5                             | 3.9                            | Tono-Vet XL  | <i>n.i.</i>                              | [53] |
| <i>Pernis apivorus</i>          | <b>European Honey Buzzard</b> | 18 | 14.4                             | 2.8                            | Tono-Vet XL  | <i>n.i.</i>                              | [53] |
| <i>Phoenicopterus Ruber</i>     | <b>American Flamingo</b>      | 56 | 11.0 (upright)<br>14.3 (feeding) | 1.6 (upright)<br>2.2 (feeding) | TonoVet      | <i>n.i.</i>                              | [60] |
|                                 |                               | 16 | 16.1                             | 4.2                            | TonoPen XL   | 3.1 (0.48 SD)<br>(2.2 – 4.4)             | [59] |
|                                 |                               | 18 | 9.5                              | 1.7                            | TonoVet      |                                          |      |
| <i>Poicephalus rufiventris</i>  | <b>Red-Bellied Parrot</b>     | 1  | 11 (left)<br>12 (right)          |                                | <i>n.i.</i>  | <i>n.i.</i>                              | [61] |
| <i>Rhea Americana</i>           | <b>Great Rhea</b>             | 1  | 12 (left)<br>11 (right)          |                                | TonoPen XL   | <i>n.i.</i>                              | [62] |

|                               |                             |    |                               |                             |             |                         |      |
|-------------------------------|-----------------------------|----|-------------------------------|-----------------------------|-------------|-------------------------|------|
| <i>Spheniscus demersus</i>    | <b>Black-Footed Penguin</b> | 36 | 31.77                         | 3.3                         | TonoVet     | 2.816 (SD not reported) | [63] |
|                               |                             | 34 | 28.13 (left)<br>30.41 (right) | 6.84 (left)<br>4.27 (right) | TonoVet (D) | <i>n.i.</i>             | [64] |
| 25.05 (left)<br>25.06 (right) | 5.56 (left)<br>4.35 (right) |    | TonoVet (H)                   |                             |             |                         |      |
| <i>Spheniscus humboldti</i>   | <b>Humboldt Penguin</b>     | 48 | 20.36                         | 4.1                         | Tono-Pen XL | <i>n.i.</i>             | [65] |
| <i>Strix aluco</i>            | <b>Eurasian Tawny Owl</b>   | 12 | 11.1                          | 3.1                         | TonoVet (D) | <i>n.i.</i>             | [40] |
|                               |                             | 40 | 11.21                         | 3.12                        | Tono-Pen XL | <i>n.i.</i>             | [54] |
| <i>Strix varia</i>            | <b>Barred Owl</b>           | 3  | 11.7                          | 3.8                         | Tono-Pen XL | <i>n.i.</i>             | [51] |
|                               |                             |    | 8.3                           | 3.2                         | TonoVet (P) |                         |      |
| <i>Struthio camelus</i>       | <b>Ostrich</b>              | 40 | 18.3                          | 3.5                         | Tono-Pen    | <i>n.i.</i>             | [66] |
| <i>Tyto alba</i>              | <b>Barn Owl</b>             | 4  | 11.5                          | 4.7                         | TonoVet (D) | <i>n.i.</i>             | [40] |
|                               |                             | 29 | 18.0                          | 6.6                         | Tono-Pen XL | <i>n.i.</i>             | [53] |

**Table C. Fish**

| <b>Species</b>              | <b>Common Name</b>   | <b>Sample Size (eyes)</b> | <b>Mean (mmHg)</b> | <b>Standard Deviation (mmHg)</b> | <b>Method</b> | <b>Weight (if indicated) (kg)</b> | <b>Source</b> |
|-----------------------------|----------------------|---------------------------|--------------------|----------------------------------|---------------|-----------------------------------|---------------|
| <i>Cyprinus carpio</i>      | <b>Koi Fish</b>      | 18                        | 4.944              | 2.99                             | TonoVet (D)   | <i>n.i.</i>                       | [67]          |
| <i>Salvelinus gairdneri</i> | <b>Rainbow Trout</b> | 54                        | 4.9                | 0.33                             | Manometer     | <i>n.i.</i>                       | [68]          |
| <i>Salvelinus namaycush</i> | <b>Lake Trout</b>    | 61                        | 13.2               | 0.67                             | Manometer     | 0.150 (0.0042 SD)                 | [68]          |

**Table D. Mammals**

| Species                                | Common Name                   | Sample Size (eyes) | Mean (mmHg)                   | Standard Deviation (mmHg) | Method       | Weight (if indicated) (kg) | Source |
|----------------------------------------|-------------------------------|--------------------|-------------------------------|---------------------------|--------------|----------------------------|--------|
| <i>Adax nasomaculatus</i>              | <b>Addax Antelope</b>         | 36                 | 11.2                          | 3.2                       | Tono-Pen XL  | 85.6 (35.6 SD)             | [69]   |
| <i>Aepyceros melampus</i>              | <b>Impala</b>                 | 8                  | 8.0                           | 1.2                       | Tono-Pen XL  | 53.5 (28.7 SD)             | [69]   |
| <i>Arctocephalus pusillus pusillus</i> | <b>South African Seal</b>     | 2                  | 31.5                          | 0.7                       | Tono-Pen     | <i>n.i.</i>                | [70]   |
| <i>Bos taurus taurus</i>               | <b>Cattle</b>                 | 20                 | 18.8                          | 1.7                       | Perkins      | <i>n.i.</i>                | [72]   |
|                                        |                               |                    | 19.7                          | 1.2                       | Manometer    |                            |        |
|                                        |                               | 64                 | 27.5                          | 4.8                       | Mackay-Marg  | <i>n.i.</i>                | [71]   |
|                                        |                               | 54                 | 28.2                          | 4.6                       | Mackay-Marg  | <i>n.i.</i>                |        |
| 26.9                                   | 6.7                           |                    | Tono-Pen XL                   |                           |              |                            |        |
| <i>Canis lupus familiaris</i>          | <b>Dog (Beagle)</b>           | 4                  | 12.8                          | 2.1                       | Langham      | <i>n.i.</i>                | [73]   |
| <i>Capra hircus</i>                    | <b>Pigmy Goat</b>             | 20                 | 11.8                          | 1.5                       | TonoVet (D)  | 33.7 (SD <i>n.i.</i> )     | [74]   |
|                                        |                               |                    | 7.9                           | 1.7                       | Tono-Vet (P) |                            |        |
|                                        |                               |                    | 10.8                          | 1.7                       | Tono-Pen XL  |                            |        |
| <i>Capra ibex nubiana</i>              | <b>Nubian Ibex</b>            | 24                 | 17.95                         | 4.78                      | Schiotz      | 39.1 (8.3 SD)              | [75]   |
| <i>Castor canadensis</i>               | <b>Canadian Beaver</b>        | 32                 | 18.79 (left)<br>17.11 (right) | 5.63<br>6.39              | Tono-Pen XL  | 7-20                       | [76]   |
| <i>Cebus abella</i>                    | <b>Capuchin Monkey</b>        | 30                 | 18.4                          | 3.8                       | Tono-Pen XL  | 2-5                        | [77]   |
| <i>Ceratotherium simum</i>             | <b>Wide-Lipped Rhinoceros</b> | 22                 | 32.1                          | 10.4                      | Tono-Pen XL  | 2055 (235 SD)              | [69]   |
| <i>Chinchilla lanigera</i>             | <b>Chinchilla</b>             | 114                | 17.71                         | 4.17                      | Tono-Pen XL  | 0.57069 (0.10869 SD)       | [78]   |
|                                        |                               | 28                 | 18.5                          | 5.75                      | Mackay-Marg  | 0.475-0.675                | [79]   |

|                                  |                                |     |                             |      |               |                    |      |
|----------------------------------|--------------------------------|-----|-----------------------------|------|---------------|--------------------|------|
| <i>Connochaetes gnou</i>         | <b>Wide-Tailed Wildebeest</b>  | 20  | 15.5                        | 3.7  | Tono-Pen XL   | 121 (68.2 SD)      | [69] |
| <i>Dama mesopotamica</i>         | <b>Asian Fallow Deer</b>       | 15  | 11.9                        | 3.3  | Tono-Pen XL   | <i>n.i.</i>        | [80] |
| <i>Equus burchelli</i>           | <b>Grant Zebra</b>             | 20  | 25.30                       | 3.06 | Schiotz       | 138 (24 SD)        | [75] |
|                                  |                                | 6   | 29.47                       | 3.43 | Tono-Pen XL   |                    |      |
| <i>Equus ferus caballus</i>      | <b>Horse</b>                   | 20  | 25.1                        | 2.9  | Manometer     | <i>n.i.</i>        | [72] |
|                                  |                                |     | 23.4                        | 3.2  | Perkins       |                    |      |
| <i>Felis catus</i>               | <b>Cat</b>                     | 8   | 17                          | 0.8  | Schiotz       | <i>n.i.</i>        | [81] |
|                                  |                                | 7   | 16                          | 2.3  |               |                    |      |
|                                  |                                | 12  | 12.7                        | 1.1  | Pneumatometer | <i>n.i.</i>        | [83] |
|                                  |                                | 8   | 24.6                        | 3.1  | Pneumatometer | 3-4                | [82] |
|                                  |                                | 8   | 24.3                        | 3.6  |               |                    |      |
|                                  |                                | 8   | 20.9                        | 3.0  |               |                    |      |
|                                  |                                | 8   | 20.8                        | 3.1  |               |                    |      |
|                                  |                                | 6   | 23.2                        | 3.4  |               |                    |      |
|                                  |                                | 6   | 24.5                        | 1.2  |               |                    |      |
|                                  |                                | 7   | 21.4                        | 1.1  |               |                    |      |
|                                  |                                | 7   | 20.4                        | 2.0  | Manometer     | 2.0-3.5            | [84] |
|                                  |                                | 6   | 17.4                        | 1.5  |               |                    |      |
| 6                                | 16.7                           | 1.6 |                             |      |               |                    |      |
| <i>Gazella thomsoni</i>          | <b>Thompson's Gazelle</b>      | 22  | 7.6                         | 1.6  | Tono-Pen XL   | 22 (3.1 SD)        | [85] |
| <i>Gorilla gorilla gorilla</i>   | <b>Western Lowland Gorilla</b> | 10  | 12.0                        | 4.3  | Schiotz       | 90.9 – 159         | [86] |
| <i>Grampus griseus</i>           | <b>Risso's Dolphin</b>         | 2   | 28.7 (left)<br>27.5 (right) | –    | Tono-Pen      | <i>n.i.</i>        | [87] |
| <i>Hemiechinus auritus</i>       | <b>Long-Eared Hedgehog</b>     | 28  | 20.1                        | 4.0  | Tono-Pen Vet  | 0.3785 (0.0924 SD) | [88] |
| <i>Homo sapiens sapiens</i>      | <b>Human</b>                   | 80  | 16.3                        | 2.9  | Goldmann      | <i>n.i.</i>        | [90] |
|                                  |                                | 74  | 14.6                        | 3.5  | Goldmann      | <i>n.i.</i>        | [89] |
| <i>Hydrochaeris hydrochaeris</i> | <b>Capybara</b>                | 44  | 16.47                       | 4.28 | Tono-Pen XL   | 37 – 63            | [91] |



|                              |                              |     |                             |             |               |                                    |       |
|------------------------------|------------------------------|-----|-----------------------------|-------------|---------------|------------------------------------|-------|
| <i>Lama glama</i>            | <b>Llama</b>                 | 32  | 13.10                       | 0.35        |               | <i>n.i.</i>                        | [92]  |
| <i>Macaca fascicularis</i>   | <b>Cynomolgus Monkey</b>     | 8   | 19.3                        | 0.8         | Goldman       | 3-8                                | [94]  |
|                              |                              | 12  | 19.6                        | 3.5         | Pneumatometer | <i>n.i.</i>                        | [93]  |
| <i>Macaca mulatta</i>        | <b>Rhesus Macaque</b>        | 11  | 16.1                        | 0.9         | Goldman       | <i>n.i.</i>                        | [95]  |
|                              |                              | 8   | 19.1                        | 1.1         |               |                                    |       |
|                              |                              | 5   | 18.3                        | 1.6         |               |                                    |       |
|                              |                              | 326 | 16.9                        | 3.8         | Applanation   |                                    | [97]  |
|                              |                              | 20  | 14.9                        | 2.5         | TonoPen XL    |                                    | [96]  |
| <i>Macropus fuliginosus</i>  | <b>Western Grey Kangaroo</b> | 16  | 10.69 (April 2008)          | 3.59        | TonoVet       | 22 – 63                            | [98]  |
|                              |                              | 12  | 9.0 (May 2008)              | <i>n.i.</i> |               |                                    |       |
|                              |                              | 16  | 17.38 (April 2008)          | 4.44        | Tono-Pen XL   |                                    |       |
|                              |                              | 12  | 11.5 (May 2008)             | <i>n.i.</i> |               |                                    |       |
| <i>Macropus rufus</i>        | <b>Red Kangaroo</b>          | 20  | 17.45                       | 7.23        | Tono-Pen XL   | 17 – 35 (female)<br>22 – 85 (male) | [41]  |
| <i>Mazama gouazoubira</i>    | <b>Brown Brocket Deer</b>    | 18  | 15.3                        | 3.1         | Tono-Pen XL   | <i>n.i.</i>                        | [99]  |
| <i>Mus musculus</i>          | <b>Mouse (Swiss White)</b>   | 20  | 15.7                        | 2.0         | Manometer     | <i>n.i.</i>                        | [101] |
|                              |                              | 6   | 16.5                        | 0.6         | Manometer     | <i>n.i.</i>                        | [100] |
|                              |                              | 8   | 15.7                        | 1.0         | Manometer     | <i>n.i.</i>                        | [102] |
| <i>Mustela putorius furo</i> | <b>Ferret</b>                | 30  | 14.5                        | 3.27        | Tono-Pen XL   | <i>n.i.</i>                        | [103] |
| <i>Orycteropus afer</i>      | <b>Aardvark</b>              | 2   | 17.0 (left)<br>14.0 (right) |             | Tono-Pen XL   | 57 – 59                            | [104] |

|                                   |                                                  |                   |                                                                                                    |                                                  |                        |                   |                      |         |       |
|-----------------------------------|--------------------------------------------------|-------------------|----------------------------------------------------------------------------------------------------|--------------------------------------------------|------------------------|-------------------|----------------------|---------|-------|
| <i>Oryctolagus cuniculus</i>      | <b>Rabbit (New Zealand White)</b>                | 8                 | 20.1                                                                                               | 1.52                                             | Pneumato-<br>nometer   | 2-2 .5            | [108]                |         |       |
|                                   |                                                  | 9                 | 21.7                                                                                               | 0.88                                             |                        |                   |                      |         |       |
|                                   |                                                  | 11                | 17.2                                                                                               | 0.9                                              |                        |                   |                      |         |       |
|                                   |                                                  |                   |                                                                                                    | 6                                                | 21.0                   | 1.5 (SE)          | Pneumato-<br>nometer | 2.5-4.0 | [109] |
|                                   |                                                  |                   |                                                                                                    | 21                                               | 17.24                  | 0.25 (SEM)        | Pneumato-<br>nometer | 3-4     | [107] |
|                                   |                                                  |                   |                                                                                                    | 10                                               | 20.1                   | 0.8 (SEM)         | Pneumato-<br>nometer | 3-4     | [106] |
|                                   |                                                  |                   |                                                                                                    | 60                                               | 20.5                   | 0.2               | Pneumato-<br>nometer | 2.1-2.7 | [105] |
| <i>Oryx dammah</i>                | <b>Scimitar-<br/>Horned Oryx</b>                 | 14                | 15.8                                                                                               | 1.5                                              | Tono-Pen<br>XL         | 111.4 (63.2 SD)   | [69]                 |         |       |
| <i>Oryx leucoryx</i>              | <b>Arabian Oryx</b>                              | 5                 | 22.68                                                                                              | 8.15                                             | Schiotz                | 132 (16.4 SD)     | [75]                 |         |       |
|                                   |                                                  | 10                | 11.76                                                                                              | 11.3.43                                          | Tono-Pen<br>XL         |                   |                      |         |       |
| <i>Ovis aries</i>                 | <b>Sheep</b>                                     | 10                | 15.20 (left)<br>14.70 (left)<br>12.70 (left)<br><br>16.2 (right)<br>14.70 (right)<br>13.90 (right) | 1.06<br>1.15<br>1.09<br><br>1.41<br>1.34<br>0.84 | Tono-Pen<br>XL         | 35.73 (1.23 SD)   | [110]                |         |       |
| <i>Panthera leo</i>               | <b>Lion</b>                                      | 44<br>(22M + 22W) | 20.9 (female)<br>24.9 (male)                                                                       | 2.4<br>2.0                                       | Schiotz                | 120 (20.3 SD)     | [111]                |         |       |
| <i>Phascolarctos<br/>cinereus</i> | <b>Koala</b>                                     | 40                | 24.2                                                                                               | 6.45                                             | Manometer              | <i>n.i.</i>       | [112]                |         |       |
| <i>Pongo pygmaeus</i>             | <b>Orangutan</b>                                 | 2                 | 13 (left)<br>14 (right)                                                                            |                                                  | Tono-Pen<br>XL         | 50                | [113]                |         |       |
| <i>Pteropus hypomelanus</i>       | <b>Island Flying<br/>Fox</b>                     | 20                | 12.1 (upright)<br>17.45 (hanging)                                                                  | 1.10<br>1.11                                     | TonoVet                | 0.425 – 0.571     | [114]                |         |       |
| <i>Pteropus pumilus</i>           | <b>Little Golden-<br/>Mantled Flying<br/>Fox</b> | 20                | 15.63 (upright)<br>22.5 (hanging)                                                                  | 1.01<br>1.27                                     | TonoVet                | 0.194             | [114]                |         |       |
| <i>Pteropus vamyprus</i>          | <b>Malayan<br/>Flying Fox</b>                    | 20                | 14.2 (upright)<br>18.2 (hanging)                                                                   | 0.89<br>1.37                                     | TonoVet                | 0.645 – 1.153     | [114]                |         |       |
| <i>Rattus norvegicus</i>          | <b>Rat<br/>(Lewis)</b>                           | 26                | 17.25                                                                                              | 1.8                                              | Tono-Pen               | 0.2946 (SD 0.069) | [115]                |         |       |
|                                   |                                                  | 229               | 17.30                                                                                              | 5.25                                             | Pressure<br>Transducer | 0.15-0.2          | [116]                |         |       |
| <i>Rhinoceros unicornis</i>       | <b>One-Horned<br/>Rhinoceros</b>                 | 10                | 31.2                                                                                               | 6.62                                             | Tono-Pen               | <i>n.i.</i>       | [117]                |         |       |

|                               |                                 |    |                              |            |                |                  |       |
|-------------------------------|---------------------------------|----|------------------------------|------------|----------------|------------------|-------|
| <i>Rusa unicolor</i>          | <b>Sambar Deer</b>              | 40 | 11.4                         | 2.8        | Tono-Pen<br>XL | 102.77 (3.35 SD) | [42]  |
| <i>Sus scrofa domesticus</i>  | <b>Domestic Pig</b>             | 14 | 14.1                         | 2.2        | <i>n.i.</i>    | 20               | [118] |
| <i>Tursiops truncatus</i>     | <b>Bottle-Nosed<br/>Dolphin</b> | 4  | 33.4 (male)<br>24.6 (female) | 2.4<br>2.3 | Tono-Pen       | <i>n.i.</i>      | [87]  |
| <i>Vicugna pacos</i>          | <b>Alpaca</b>                   | 36 | 14.85                        | 0.45       |                | <i>n.i.</i>      | [92]  |
| <i>Zalophus californianus</i> | <b>California Sea<br/>Lion</b>  | 39 | 32.8                         | 3.2        | TonoVet        | <i>n.i.</i>      | [119] |

**Table E. Reptiles**

| Species                             | Common Name                    | Sample Size (eyes) | Mean (mmHg) | Standard Deviation (mmHg) | Method      | Weight (if indicated) (kg)                                | Source |
|-------------------------------------|--------------------------------|--------------------|-------------|---------------------------|-------------|-----------------------------------------------------------|--------|
| <i>Alligator mississippiensis</i>   | <b>American Alligator</b>      | 16                 | 11.6        | 0.5                       | Applanation | <i>n.i.</i>                                               | [43]   |
| <i>Caiman latirostris</i>           | <b>Broad-Snouted Caiman</b>    | 28                 | 12.9        | 6.1                       | Tono-Pen XL | <i>n.i.</i>                                               | [120]  |
| <i>Chelonoidis carbonaria</i>       | <b>Red-Footed Tortoise</b>     | 50                 | 15.3        | 8.81                      | Tono-Pen    | <i>n.i.</i>                                               | [121]  |
| <i>Chelonoidis denticulate</i>      | <b>Yellow-Footed Tortoise</b>  | 30                 | 14.2        | 1.2                       | Tono-Pen    | <i>n.i.</i>                                               | [122]  |
| <i>Cyclura cyclura cyclura</i>      | <b>Andros Island Iguana</b>    | 104                | 4.89        | 1.73                      | TonoVet (P) | 2.4766 (1.663 SD)                                         | [123]  |
| <i>Emys Orbicularis</i>             | <b>European Pond Turtle</b>    | 44                 | 5.42        | 0.96                      | TonoVet (P) | 0.39228 (0.0731 SD) (female)<br>0.25884 (0.073 SD) (male) | [124]  |
| <i>Terrapene carolina major</i>     | <b>Gulf Coast Box Turtle</b>   | 138                | 6.7         | 1.4                       | TonoVet (P) | 0.7217 (0.1561 SD)                                        | [125]  |
| <i>Terrapene carolina triunguis</i> | <b>Three-Toed Box Turtle</b>   | 48                 | 8.3         | 1.5                       | TonoVet (P) | 0.4195 (0.1037 SD)                                        | [125]  |
| <i>Testudo hermanni</i>             | <b>Hermann's Tortoise</b>      | 52                 | 15.74       | 0.2                       | Rebound     | 0.255 – 2.310                                             | [126]  |
| <i>Trachemys scripta elegans</i>    | <b>Red-Eared Slider Turtle</b> | 34                 | 10.2        | 0.66                      | TonoLab     | 0.770 (0.130 SD)                                          | [127]  |
|                                     |                                |                    | 11.32       | 1.57                      | TonoVet     |                                                           |        |

**Table F. List of tonometers**

| <b>Tonometer</b> | <b>Type of Tonometry</b>                | <b>Manufacturer (if commercial tonometer)</b> | <b>Notes</b>                                                                                |
|------------------|-----------------------------------------|-----------------------------------------------|---------------------------------------------------------------------------------------------|
| Tono-Pen         | Applanation                             | Reichert Technologies, Buffalo, NY, USA       | –                                                                                           |
| Tono-Pen XL      | Applanation                             | Reichert Technologies, Buffalo, NY, USA       | –                                                                                           |
| Tono-Pen Vet     | Applanation                             | Reichert Technologies, Buffalo, NY, USA       | –                                                                                           |
| TonoVet          | Rebound                                 | Icare Finland Oy, Vanta, Finland              | <b>Three calibrations:</b><br>(D) Dog<br>(H). Horse<br>(P). No specific species calibration |
| TonoLab          | Rebound                                 | Icare Finland Oy, Vanta, Finland              | –                                                                                           |
| Perkins          | Applanation                             | Haag-Streit, Harlow, UK                       | –                                                                                           |
| Mackay-Marg      | Applanation and Indentation             | –                                             | –                                                                                           |
| Langham          | Applanation                             | –                                             | –                                                                                           |
| Schiotz          | Indentation                             | –                                             | –                                                                                           |
| Manometer        | Pneumatonometer/<br>Pressure transducer | –                                             | –                                                                                           |
| Goldman          | Applanation                             | –                                             | –                                                                                           |
